# Supplementary material for: On the right track: decoding self-regulated learning in young students’ log data with the digital train track task
Source: Frontiers journal article supplement (doi:10.3389/feduc.2024.1388202), 2024-10-08
Supplement: Table_1.docx [file Table_1.docx]

# Tables in Appendix

**Table 1:** *Results Wilcoxon-Mann-Whitney Test comparison log data and think aloud data*

|  | *Z* |
| --- | --- |
| TECHNICAL_ ORIENTATION | -3.35*** |
| CHECKING_PLAN | 6.06*** |
| MONITORING_ UNDERSTANDING_MISTAKE | 4.20*** |
| CHECK_ CONSTRUCTION | -0.74 |
| SEARCH_SORT_ MAKESPACE | 4.46*** |
| SEEKING_HELP | 0.16 |
| CORRECT_ MISTAKE | 7.39*** |
| CHANGE_ STRATEGY | 3.74*** |

*Note.* Statistical comparison was done with the use of the Wilcoxon signed rank tests for pair-wise comparison (use Bonferroni correction); Legend:differences between total frequencies;

* p < 0.05; ** p < 0.01; and *** p < 0.001

**Table 2:** *Means, standard deviations, and correlations with confidence intervals*

| Variable | *M* | *SD* | 1 | 2 | 3 | 4 | 5 | 6 | 7 | 8 | 9 | 10 | 11 | 12 | 13 | 14 | 15 |
| --- | --- | --- | --- | --- | --- | --- | --- | --- | --- | --- | --- | --- | --- | --- | --- | --- | --- |
| 1. Technical Orientation (TAP) | 1.13 | 0.99 |  |  |  |  |  |  |  |  |  |  |  |  |  |  |  |
| 2. Checking Plan (TAP) | 3.06 | 2.97 | .18 [-.05, .39] |  |  |  |  |  |  |  |  |  |  |  |  |  |  |
| 3. Monitoring Understanding and Mistakes (TAP) | 6.90 | 6.90 | .36** [.15, .54] | .58** [.41, .71] |  |  |  |  |  |  |  |  |  |  |  |  |  |
| 4. Check Construction (TAP) | 0.66 | 0.99 | -.06 [-.28, .16] | .15 [-.07, .37] | .31** [.09, .50] |  |  |  |  |  |  |  |  |  |  |  |  |
| 5. Search, Sort and Make Space (TAP) | 2.66 | 2.34 | .48** [.29, .64] | .56** [.38, .70] | .39** [.18, .56] | -.03 [-.25, .20] |  |  |  |  |  |  |  |  |  |  |  |
| 6. Seeking Help (TAP) | 0.88 | 1.46 | .33** [.11, .51] | .01 [-.21, .23] | .26* [.04, .46] | .14 [-.09, .35] | .04 [-.19, .26] |  |  |  |  |  |  |  |  |  |  |
| 7. Correct Mistake (TAP) | 2.94 | 3.29 | .28* [.07, .48] | .70** [.57, .80] | .73** [.60, .82] | .18 [-.04, .39] | .54** [.36, .68] | -.02 [-.24, .21] |  |  |  |  |  |  |  |  |  |
| 8. Change Strategy (TAP) | 0.58 | 0.94 | .16 [-.07, .37] | .28* [.06, .47] | .54** [.36, .68] | .29* [.07, .48] | .13 [-.10, .34] | .16 [-.07, .37] | .27* [.05, .46] |  |  |  |  |  |  |  |  |
| 9. Technical Orientation  (Log data) | 0.62 | 0.51 | .07 [-.16, .29] | -.09 [-.31, .14] | -.13 [-.35, .09] | -.12 [-.34, .10] | -.04 [-.26, .18] | -.06 [-.28, .17] | -.05 [-.27, .18] | -.06 [-.28, .17] |  |  |  |  |  |  |  |
| 10. Checking Plan  (Log data) | 8.68 | 6.77 | .18 [-.05, .39] | .62** [.45, .74] | .49** [.30, .64] | .28* [.06, .48] | .32** [.10, .51] | .23* [.01, .43] | .41** [.20, .58] | .26* [.04, .46] | -.24* [-.44, -.02] |  |  |  |  |  |  |
| 11. Monitoring  Understanding and Mistakes  (Log data) | 15.64 | 16.04 | .24* [.01, .44] | .41** [.21, .58] | .62** [.45, .74] | .21 [-.01, .42] | .18 [-.04, .39] | .37** [.16, .55] | .36** [.15, .54] | .53** [.35, .67] | -.18 [-.39, .05] | .67** [.53, .78] |  |  |  |  |  |
| 12. Check Construction  (Log data) | 0.71 | 1.34 | .01 [-.22, .23] | .37** [.16, .55] | .31** [.09, .50] | .18 [-.04, .39] | .10 [-.13, .32] | .14 [-.09, .35] | .19 [-.04, .40] | .22 [-.01, .42] | -.29** [-.48, -.07] | .68** [.54, .79] | .40** [.19, .57] |  |  |  |  |
| 13. Search, Sort and Make Space (Log data) | 5.77 | 5.07 | .16 [-.06, .37] | .30** [.08, .49] | .47** [.28, .63] | .22 [-.01, .42] | .25* [.03, .45] | .13 [-.10, .34] | .33** [.12, .52] | .44** [.24, .61] | -.06 [-.28, .17] | .38** [.18, .56] | .54** [.37, .68] | .20 [-.03, .41] |  |  |  |
| 14. Seeking Help (Log data) | 0.60 | 0.80 | -.02 [-.24, .21] | -.03 [-.26, .19] | -.00 [-.22, .22] | -.02 [-.25, .20] | -.03 [-.25, .19] | .09 [-.13, .31] | -.04 [-.26, .19] | -.07 [-.29, .16] | -.60** [-.73, -.43] | .17 [-.06, .38] | .14 [-.09, .35] | .15 [-.08, .36] | .16 [-.06, .37] |  |  |
| 15. Correct Mistakes  (Log data) | 12.66 | 12.29 | .26* [.04, .46] | .44** [.24, .61] | .59** [.43, .72] | .22 [-.01, .42] | .20 [-.03, .40] | .37** [.16, .55] | .38** [.17, .56] | .49** [.30, .64] | -.16 [-.37, .07] | .69** [.55, .79] | .99** [.98, .99] | .40** [.19, .57] | .47** [.28, .63] | .11 [-.11, .33] |  |
| 16. Change Strategy  (Log data) | 2.23 | 4.02 | .26* [.04, .46] | .36** [.14, .54] | .55** [.37, .69] | .19 [-.03, .40] | .21 [-.02, .41] | .38** [.17, .56] | .27* [.05, .47] | .44** [.24, .61] | -.24* [-.44, -.01] | .58** [.41, .71] | .87** [.80, .92] | .34** [.12, .52] | .33** [.12, .52] | .09 [-.14, .31] | .84** [.76, .90] |

*Note.* *M* and *SD* are used to represent mean and standard deviation, respectively. Values in square brackets indicate the 95% confidence interval for each correlation. The confidence interval is a plausible range of population correlations that could have caused the sample correlation (Cumming, 2014). * indicates *p* < .05. ** indicates *p* < .01.

**Table 3**

*Descriptive Statistics*

|  | **N** | **Female** | **Male** | **Missing** |
| --- | --- | --- | --- | --- |
| Grade 2 | 13 | 6 | 4 | 3 |
| Grade 3 | 25 | 9 | 12 | 4 |
| Grade 4 | 14 | 5 | 9 | 0 |
| Grade 5 | 33 | 16 | 12 | 5 |
| Total | 85 | 36 | 37 | 12 |
